# Supplementary material
Source: JCI journal article supplement (doi:10.1172/jci179233)
Supplement: sd1 [file 1]

**Supplemental Table 1. Clinical characteristics of normal pregnant women in the first (1<sup>st</sup>), second (2<sup>nd</sup>) and third (3<sup>rd</sup>) trimesters of pregnancy.**

| Clinical characteristics | 1 <sup>st</sup><br>(n=30) | 2 <sup>nd</sup><br>(n=15) | 3 <sup>rd</sup><br>(n=15) | <i>P</i> -value |
|--------------------------|---------------------------|---------------------------|---------------------------|-----------------|
| Age (y)                  | 26.61±2.51                | 27.60 ±7.10               | 25.46±4.46                | > 0.05          |
| BMI (kg/m <sup>2</sup> ) | 20.14 ±3.70               | 19.58 ±4.82               | 20.79±6.35                | > 0.05          |
| Gestational weeks (w)    | 8.70 ± 2.10               | 19.60 ± 3.40              | 38.2 0± 2.45              | < 0.01          |
| Gravidity                | 1.80 ± 0.85               | 1.27 ± 0.80               | 1.40 ± 0.83               | > 0.05          |
| Parity                   | 1.573 ±0.82               | 1.20 ± 0.94               | 1.33 ± 1.05               | > 0.05          |

Note: Data are presented as the mean ± SEM via one-way ANOVA test.

**Supplemental Table 2. The specific antibodies used in the study.**

| <b>Antibodies</b>                        | <b>Identifier</b> | <b>Clone</b> | <b>Source</b>             |
|------------------------------------------|-------------------|--------------|---------------------------|
| Anti-Stat1 Rabbit mAb                    | Cat#14994         | D1K9Y        | Cell Signaling Technology |
| Anti-Stat3 Mouse mAb                     | Cat#9139          | 124H6        | Cell Signaling Technology |
| Anti-Phospho-Stat3 XP Rabbit mAb         | Cat#9145          | D3A7         | Cell Signaling Technology |
| Anti-Phospho-Stat1 Rabbit mAb            | Cat#9167          | 58D6         | Cell Signaling Technology |
| Anti-PRDM1/Blimp1                        | Cat#ab198287      | EPR16655     | Abcam                     |
| Anti-FITC human CD4                      | Cat#11-0084-42    | GK1.5        | Ebioscience               |
| Anti-APC human CD25                      | Cat#302609        | BC96         | Biolegend                 |
| Anti-Brilliant Violet 421 human CD127    | Cat#351309        | A019D5       | Biolegend                 |
| Anti-PE human Foxp3                      | Cat#12-4776-41    | PCH101       | Ebioscience               |
| Anti-PE mouse CD366                      | Cat#134003        | B8.2C12      | Biolegend                 |
| Anti-FITC mouse CD4                      | Cat#100405        | GK1.5        | Biolegend                 |
| Anti-APC mouse CD25                      | Cat#17-0251-82    | PC61.5       | Ebioscience               |
| Anti-ultra-LEAF Purifies mouse IL-27 p28 | Cat#516912        | MM27-7B1     | Biolegend                 |
| Anti-mouse monoclonal- $\beta$ -actin    | Cat#66009-1-Ig    | 2D4H5        | Proteintech               |
| Anti-goat anti-mouse IgG (488)           | Cat#A23210        | —            | Babine                    |
| Goat anti-rabbit IgG (594)               | Cat#A23420        | —            | Abbkine                   |

|                             |               |   |             |
|-----------------------------|---------------|---|-------------|
| Donkey anti-goat IgG (488)  | Cat#ab150129  | — | Abcam       |
| Donkey anti-mouse IgG (555) | Cat#ab150106  | — | Abcam       |
| Goat anti-rabbit HRP        | Cat#SA00001-1 | — | Proteintech |
| Rabbit anti-goat HRP        | Cat#SA00001-4 | — | Proteintech |

---

**Supplemental Table 3. The primer sequences used in the study.**

| <b>Primer</b>                   | <b>Forward</b>          | <b>Reverse</b>          |
|---------------------------------|-------------------------|-------------------------|
| <i>m-TGF<math>\beta</math></i>  | TGATACGCCTGAGTGGCTGTCT  | TGATACGCCTGAGTGGCTGTCT  |
| <i>m-TNF<math>\alpha</math></i> | GCCTCTTCTCATTCTGCTTG    | CTGATGAGAGGGAGGCCATT    |
| <i>m-IL-6</i>                   | CGGCCTTCCCTACTTCACA     | CATTTCCACGATTTCCCAGA    |
| <i>m-IL-1<math>\beta</math></i> | TGGACCTTCCAGGATGAGGACA  | GTTTCATCTCGGAGCCTGTAGTG |
| <i>mIL-10</i>                   | CGGGAAGACAATAACTGCACCC  | CGGTTAGCAGTATGTTGTCCAGC |
| <i>m-GZMB</i>                   | CAGGAGAAGACCCAGCAAGTCA  | CTCACAGCTCTAGTCCTCTTGG  |
| <i>m-PRDM1</i>                  | AAGACGTTTCGGTCAGCTCTCCA | CTGGCACTCATGTGGCTTCTCT  |
| <i>m-STAT1</i>                  | GCCTCTCATTGTCACCGAAGAAC | TGGCTGACGTTGGAGATCACCA  |
| <i>m-STAT3</i>                  | AGGAGTCTAACAACGGCAGCCT  | GTGGTACACCTCAGTCTCGAAG  |
| <i>m-AKT</i>                    | GGACTACTTGCACTCCGAGAAG  | CATAGTGGCACCGTCCTTGATC  |
| <i>m-JNK</i>                    | CGCCTTATGTGGTGA CTGCTA  | TCCTGGAAAGAGGATTTTGTGGC |
| <i>m-Inos</i>                   | GTTCTCAGCCCAACAATACAAGA | GTGGACGGGTCGATGTCAC     |
| <i>m-Arg1</i>                   | CCACAGTCTGGCAGTTGGAAG   | GGTTGTCAGGGGAGTGTTGATG  |
| <i>m-Actin</i>                  | TGCGTGACATCAAAGAGAAG    | TCCATACCCAAGAAGGAAGG    |
| <i>h-HAVCR2</i>                 | GACTCTAGCAGACAGTGGGATC  | GGTGGTAAGCATCCTTGGAAGG  |
| <i>h-PRDM1</i>                  | CAGTTCCTAAGAACGCCAACAGG | GTGCTGGATTACATAGCGCATC  |
| <i>h-IL-1<math>\beta</math></i> | CCACAGACCTTCCAGGAGAATG  | GTGCAGTTCAGTGATCGTACAGG |
| <i>h-TGF<math>\beta</math></i>  | TACCTGAACCCGTGTTGCTCTC  | GTTGCTGAGGTATCGCCAGGAA  |
| <i>h-STAT1</i>                  | ATGGCAGTCTGGCGGCTGAATT  | CCAAACCAGGCTGGCACAATTG  |
| <i>h-STAT3</i>                  | CTTTGAGACCGAGGTGTATCACC | GGTCAGCATGTTGTACCACAGG  |
| <i>h-MAPK1</i>                  | ACACCAACCTCTCGTACATCGG  | TGGCAGTAGGTCTGGTGCTCAA  |
| <i>h-GAPDH</i>                  | GTCTCCTCTGACTTCAACAGCG  | ACCACCCTGTTGCTGTAGCCAA  |

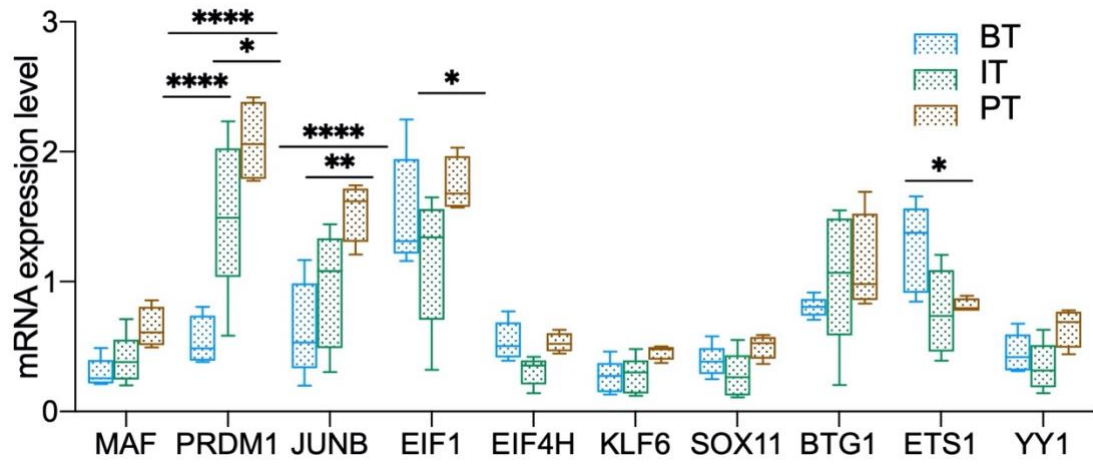

**FigS1. Relative expression levels of 10 significantly differentially expressed transcription factors among the BT, IT, and PT groups.** BT: peripheral Treg, IT: Treg in decidua basalis; PT: Treg in decidua parietalis. Data are presented as the mean  $\pm$  SEM via one-way ANOVA test. \* $P < 0.05$ , \*\* $P < 0.01$ , \*\*\*\* $P < 0.0001$ .

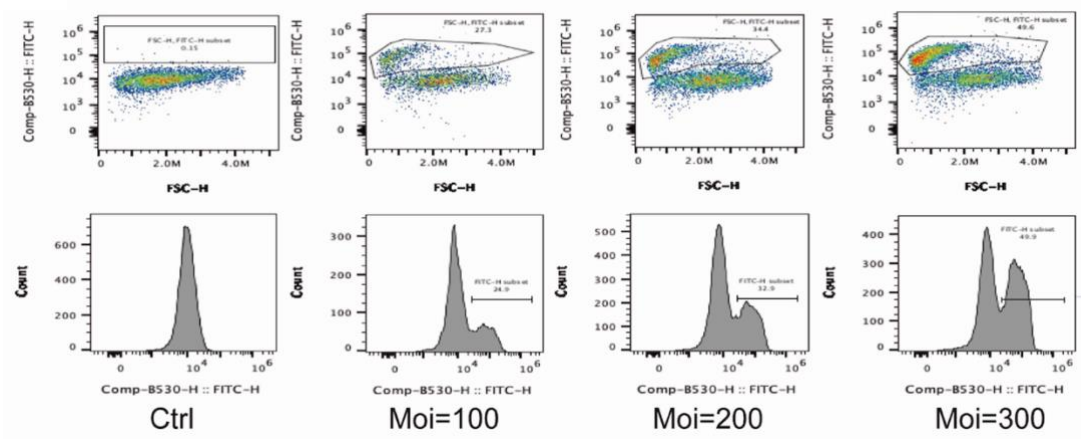

**FigS2. FCM analysis of AAV transduction efficiency.** At a MOI of 100, the efficiency of AAV in primary Tregs was approximately 20%; At a MOI of 200, the efficiency was approximately 35%; At a MOI of 300, the efficiency could reach 50%.

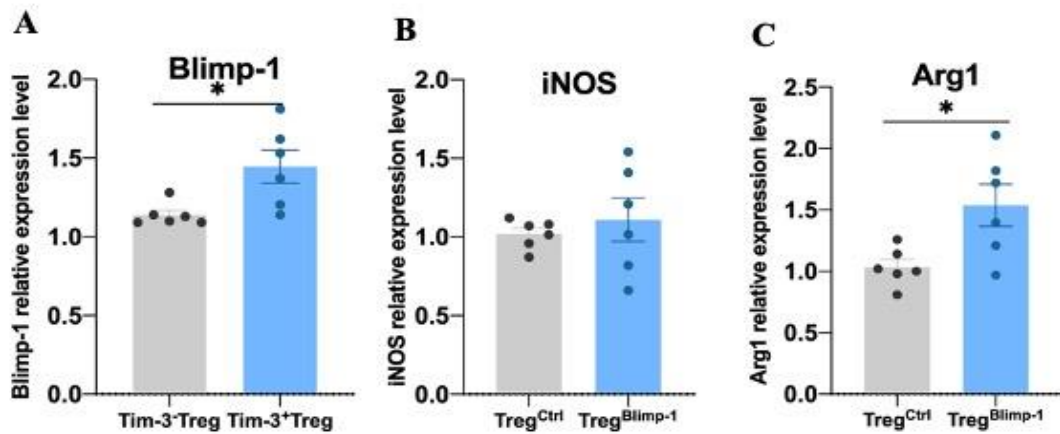

**FigS3. Detection for the mRNA expression levels of Blimp-1, iNOS and Arg1 by qPCR.** (A) Comparison of Blimp-1 mRNA levels in sorted Tim-3<sup>+</sup> versus Tim-3<sup>-</sup> Tregs detected by qPCR method. (B-C) Comparison of iNOS (inducible nitric oxide synthase; M1 marker) and Arg1 (arginase 1; M2 marker) mRNA levels in BMDM after co-cultured with Tregs only or Blimp-1 overexpressed Tregs detected by qPCR method. Data are presented as the mean ± SEM via unpaired two-tailed Student's *t* test. \**P* < 0.05.

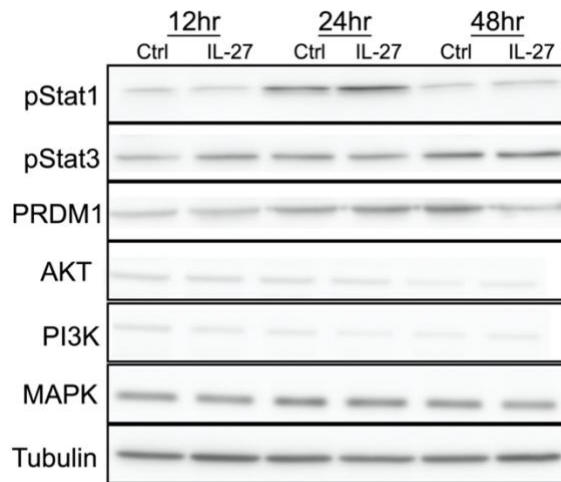

**FigS4. The downstream signaling pathway of IL-27.** After exogenously adding IL-27 to JNKat cells, WB detection was conducted at 12 h, 24 h, and 48 h, respectively.

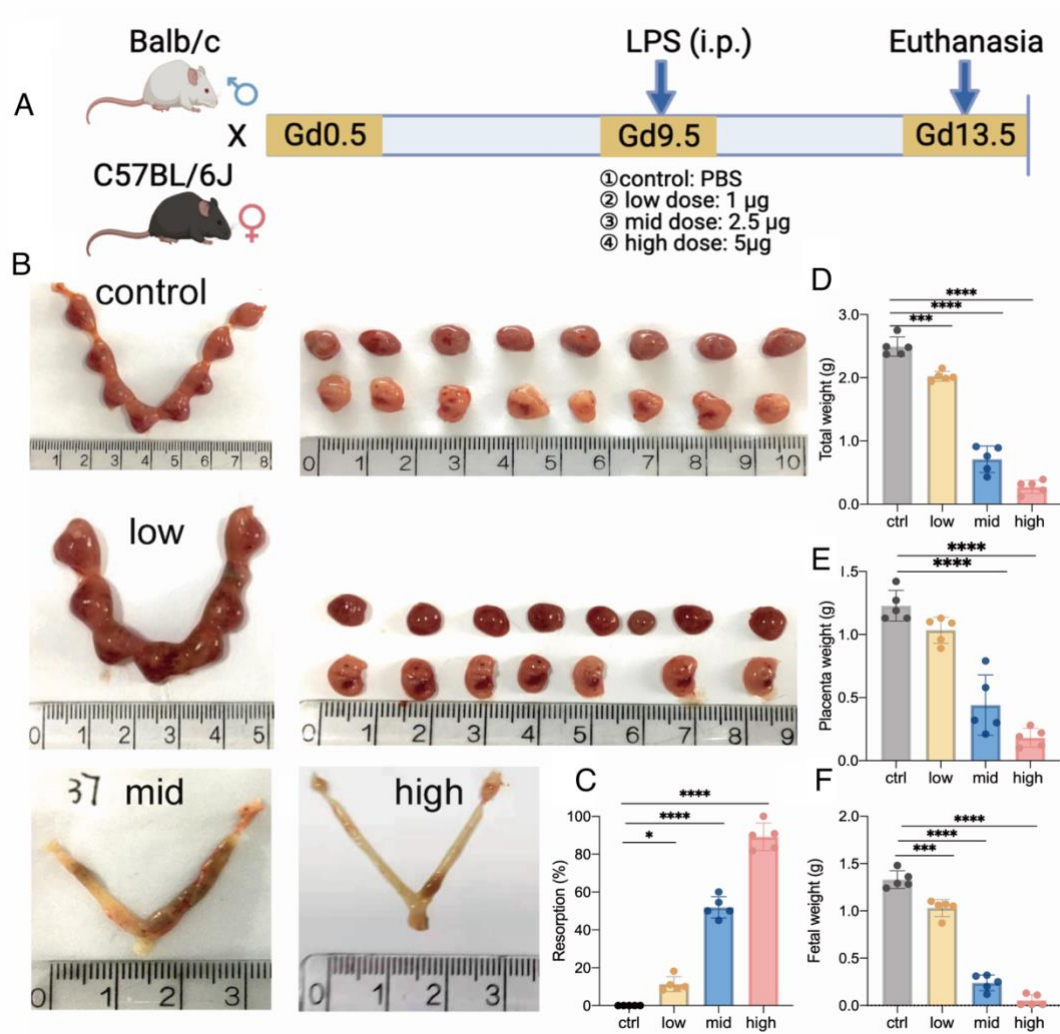

**FigS5. Construction of LPS-induced abortion-prone mouse model.** (A) Establishment of abortion-prone mouse model by using low, mid, and high doses of LPS. (B) Pregnancy outcomes in different LPS dose groups. (C) Statistical graph of resorption rate in different dosage groups of mice. (D-F) Statistical graph of overall weight, placental weight, and fetal weight changes in different dosage groups. Data are represented as the mean  $\pm$  SEM via one-way ANOVA test. \* $P < 0.05$ , \*\*\* $P < 0.001$ , \*\*\*\* $P < 0.0001$ .

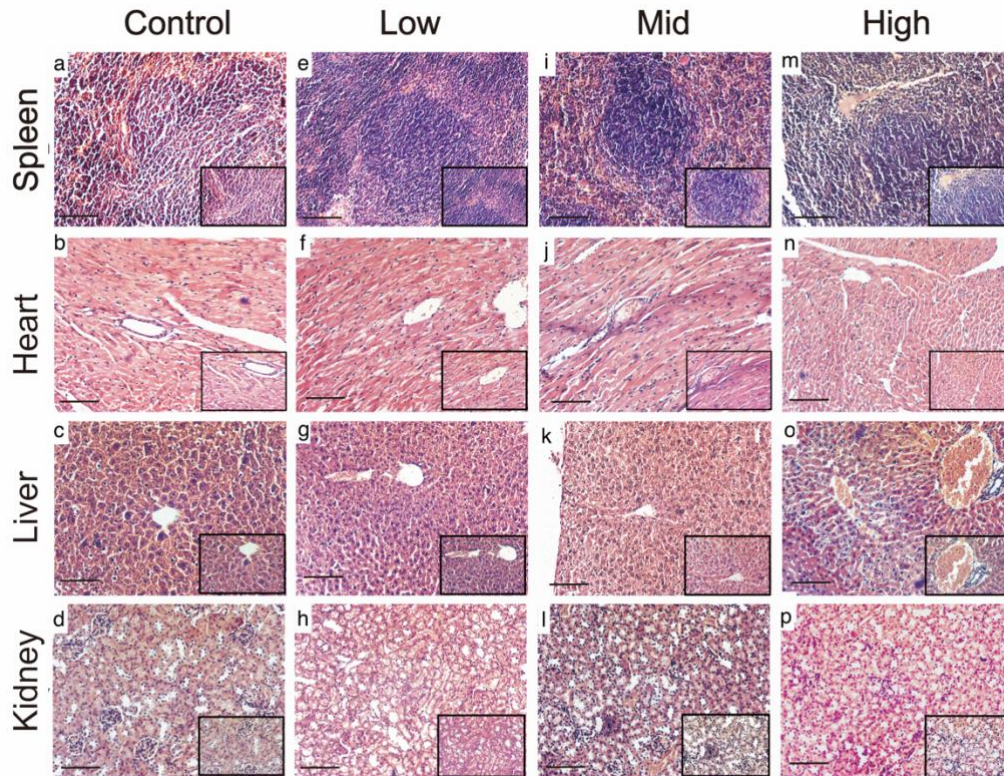

**FigS6. HE staining for spleen, heart, liver, and kidney at GD 13.5 in different LPS dose groups of mice.** (a-d) PBS control; (e-h) Low-dose LPS group (1  $\mu$ g LPS / mouse); (i-l) Mid-dose LPS group (2.5  $\mu$ g LPS / mouse); (m-p) High-dose LPS group (5  $\mu$ g LPS /mouse); Scale bar: 100  $\mu$ m.

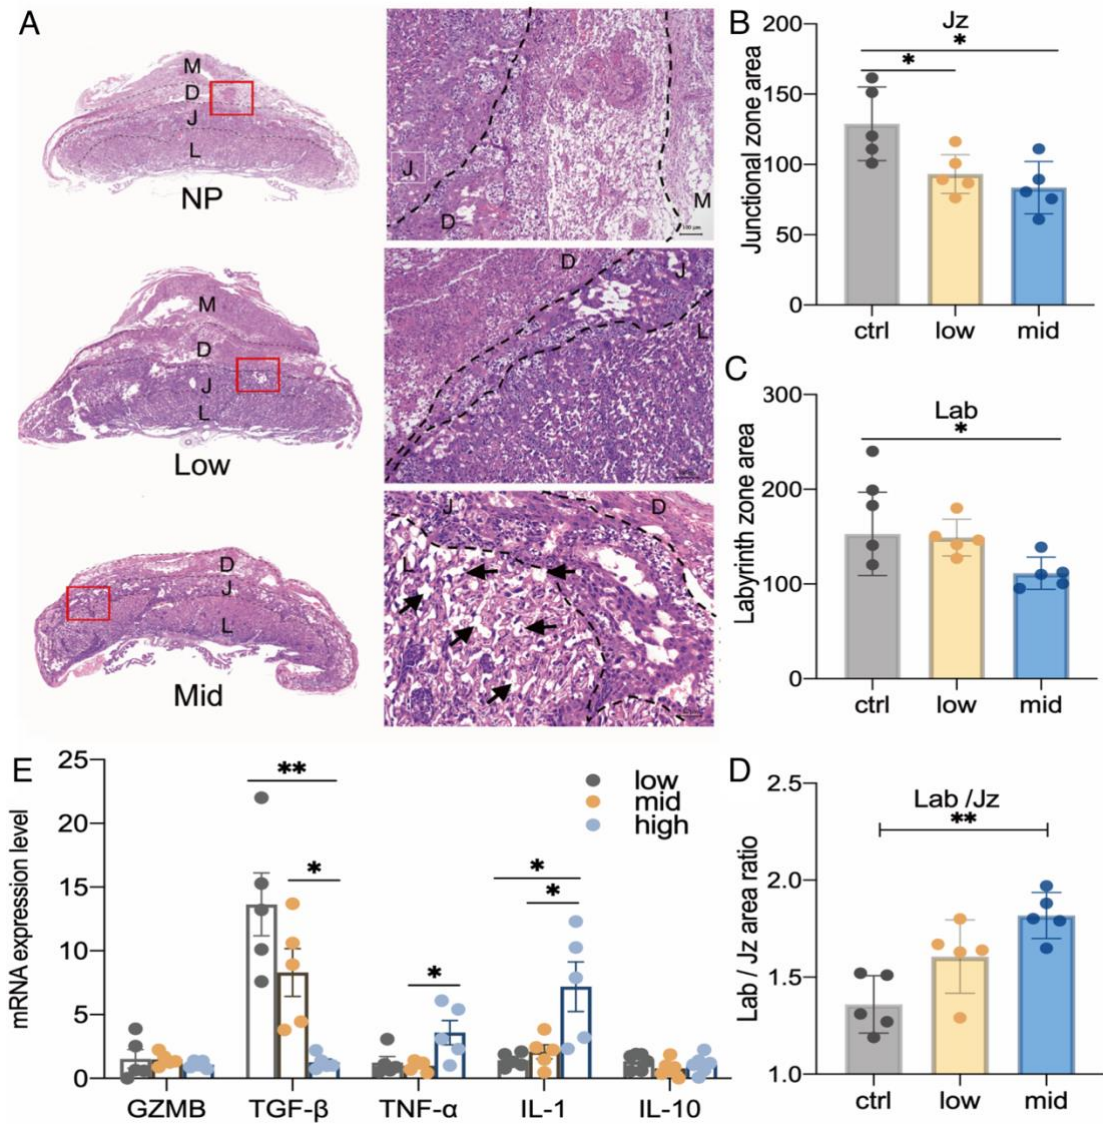

**FigS7. Placental morphology and cytokine expression in mouse decidua at GD 13.5.** (A) Hematoxylin and eosin staining depicting distinct layers of mouse placenta at GD13.5. (B-D) Comparison of the junctional zone (Jz), labyrinth zone (Lab) and Lab/Jz ratio; (E) qPCR analysis of cytokine expression levels (GZMB, TGF- $\beta$ , TNF- $\alpha$ , IL-1, and IL-10 mRNA) in placental tissues of different LPS dose groups. Black arrows indicate cell spaces in the labyrinth zone; Scale: 100  $\mu$ m. Data are represented as the mean  $\pm$  SEM via one-way ANOVA test and Tukey's multiple comparisons test between each two groups. \* $P$  < 0.05, \*\* $P$  < 0.01.

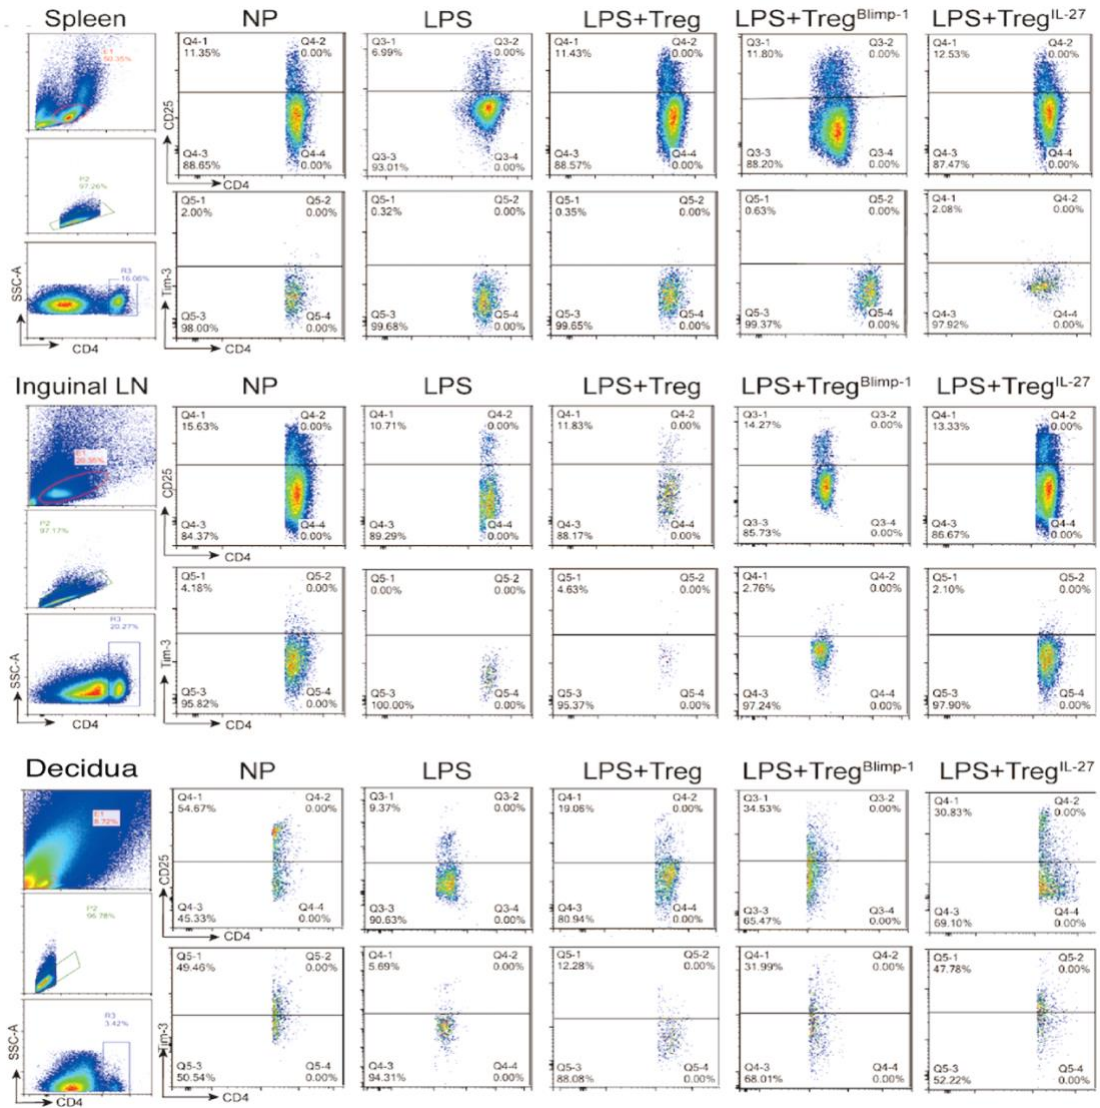

**FigS8. Gating strategy and representative figures for detecting the proportions of Tregs and Tim-3<sup>+</sup> Tregs in the spleen, inguinal lymph nodes and decidua of each group at GD 13.5 by FCM.**
